# Supplementary material for: Synthetic and biological nanoparticles for cancer immunotherapy
Source: Royal Society of Chemistry journal article supplement (doi:10.1039/d4bm00995a), 2024-01-01
Supplement: d4bm00995a1.xlsx [file d4bm00995a1.xlsx]

## Sheet: Supp. Table 1 - synthetic NPs
Supplementary Table 1
Type of cancer	Formulation	Method of action	Target immune cell	References	Reference number
Glioblastoma	Angiopep2-aPD-L1 @ PTX nano-micelle created by crosslinking anti-PD-L1 antibodies (aPD-L1) and electrostatically binding paclitaxel (PTX) onto the amino groups of polyethylene glycol-poly-L-lysine	The angiopep-2 peptide that decorates the surface of micelles to allows for tumor targgeting and penetration. These micelles are redox-responsive in the TME and release PTX that inhibits tumor growth and sensitizes tumors to the PD-1/PD-L1 inhibition axis	DCs	Zhang, Z., Xu, X., Du, J. et al. Redox-responsive polymer micelles co-encapsulating immune checkpoint inhibitors and chemotherapeutic agents for glioblastoma therapy.Nat Commun 15, 1118 (2024). https://doi.org/10.1038/s41467-024-44963-3	156
Breast cancer	Micelles composed by NLG919 or R780 and MPEG-PCL	The NIR photosensitizer (IR780) and NLG919 effectively inhibited tumor growth and stimulated an immune response by causing T cell differentiation into CD8+ T cells	T cells	Peng, J., Xiao, Y., Li, W., Yang, Q., Tan, L., Jia, Y., … Qian, Z. (2018). Photosensitizer Micelles Together with IDO Inhibitor Enhance Cancer Photothermal Therapy and Immunotherapy. Advanced Science, 5(5), 1700891. doi:10.1002/advs.201700891	157
Gastric Cancer	PEG-PCL polymer reacted with aPD1 and DAC	NPs conjugated with aPD1 and containing the demethylating drug DAC target TILs to reverse T cell exhaustion and enhance the response to immune checkpoint blockade therapy in gastric cancer	Tumor-infiltrating T cells	Hu N, Li W, Hong Y, et al. A PD1 targeted nano-delivery system based on epigenetic alterations of T cell responses in the treatment of gastric cancer. Mol Ther Oncolytics. 2021;24:148-159. Published 2021 Dec 9. doi:10.1016/j.omto.2021.12.006	158
Pancreatic Cancer	SPINs were conjugated to immunomodulators by covalent links via a 1O2-cleavable linker.	By using US irradiation the immunomodulatory molecules NLG919 and anti-PD-L1 antibody are released reprogramming the tumor microenvironment and transforming "cold" non-immunogenic tumors into "hot" immunogenic ones	T cells	Hu N, Li W, Hong Y, et al. A PD1 targeted nano-delivery system based on epigenetic alterations of T cell responses in the treatment of gastric cancer. Mol Ther Oncolytics. 2021;24:148-159. Published 2021 Dec 9. doi:10.1016/j.omto.2021.12.006	159
Melanoma	CTLA-4 siRNA encapsulated in NPs with poly (ethyl)-block-poly (D,L-lactide) and a cationic lipid (BHEM-Chol)	This treatment showed that TILs were activated and produced anti-tumor immune responses by delivering CTLA-4-siRNA. Additionally, the percentage of anti-tumor CD8+ T cells was significantly increased, and Treg ratio was decreased	T cells	Li, S.-Y., Liu, Y., Xu, C.-F., Shen, S., Sun, R., Du, X.-J., … Wang, J. (2016). Restoring anti-tumor functions of T cells via nanoparticle-mediated immune checkpoint modulation. Journal of Controlled Release, 231, 17–28.doi:10.1016/j.jconrel.2016.01	160
Melanoma	NPs composed by DEAP, MMP-2, DPPA-1), coassembled with NLG919	The acidic TME leads to NP breakdown and consequently to the release of DPPA-1 and NLG919, which activates cytotoxic T cells	CD8 + cytotoxic T cells	Cheng, K., Ding, Y., Zhao, Y., Ye, S., Zhao, X., Zhang, Y., … Nie, G. (2018). Sequentially Responsive Therapeutic Peptide Assembling Nanoparticles for Dual-Targeted Cancer Immunotherapy. Nano Letters, 18(5), 3250–3258. doi:10.1021/acs.nanolett.8b010	161
Lung cancer	Manganese dioxide NPs encapsulating a siRNA to knockdown TGF-β-R2	This project aimed to restore NK function after TGF-β action by silencing TGF-β-R2 expression	NK cells	Adjei, I. M., Jordan, J., Tu, N., Trinh, T. L., Kandell, W., Wei, S., & Sharma, B. (2019). Functional recovery of natural killer cell activity by nanoparticle‐mediated delivery of transforming growth factor beta 2 small interfering RNA. Journal of Interdisciplinary Nanomedicine, 4(4), 98–112. doi:10.1002/jin2.63	162
Colorectal cancer	Calcium phosphate nanoparticles carrying CpG and viral antigens	Therapeutic vaccination with antigens increased the frequencies of cytotoxic CD8+ T cells in the tumor accompanied with significantly repressed tumor growth	CD8+ cytotoxic T cells	Heße, C., Kollenda, S., Rotan, O., Pastille, E., Adamczyk, A., Wenzek, C., … Knuschke, T. (2019). A tumor-peptide based nanoparticle vaccine elicits efficient tumor growth control in anti-tumor immunotherapy. Molecular Cancer Therapeutics, molcanther.0764.2018. doi:10.1158/1535-7163.mct-18-0764	172
Colorectal cancer derived liver metastasis	Lipid calcium phosphate NPs delivering co-encapsulated adjuvants cGAMP, and 50 pppdsRNA	All adjuvants elicited a robust IFN-y response and 50 pppdsRNA resulted in a significant increase in CD8+ T cells, culminating in significant cancer growth inhibition	CD8+ cytotoxic T cells	Goodwin, T. J., & Huang, L. (2017). Investigation of phosphorylated adjuvants co-encapsulated with a model cancer peptide antigen for the treatment of colorectal cancer and liver metastasis. Vaccine, 35(19), 2550–2557. doi:10.1016/j.vaccine.2017.03.06	173
Melanoma	High-density lipoprotein-mimicking nanodiscs coupled with antigen peptides and adjuvants	These nanodiscs can significantly enhance co-delivery of adjuvants and antigens, activating DCs and T cells, promoting immunity against tumor antigens and a long-term T-cell response while significantly retarding tumor growth	CD8+ cytotoxic T cells	Kuai, R., Ochyl, L. J., Bahjat, K. S., Schwendeman, A., & Moon, J. J. (2016). Designer vaccine nanodiscs for personalized cancer immunotherapy. Nature Materials, 16(4), 489–496. doi:10.1038/nmat4822	174
Melanoma	Lymph node-targeting lipid NP used to deliver OVA-encoding mRNA	The study demonstrates the potential of the lipid NP for targeted mRNA delivery in cancer vaccines, leading to enhanced immune responses and therapeutic effects with reduced side effects	CD8 + cytotoxic T cells	Chen J, Ye Z, Huang C, Qiu M, Song D, Li Y, Xu Q. Lipid nanoparticle-mediated lymph node-targeting delivery of mRNA cancer vaccine elicits robust CD8+ T cell response. Proc Natl Acad Sci U S A. 2022 Aug 23;119(34):e2207841119. doi: 10.1073/pnas.2207841119. Epub 2022 Aug 15. PMID: 35969778; PMCID: PMC9407666.	175
Melanoma	Tumosomes synthesized through cell membrane proteins as tumor-associated antigens with two lipid-based adjuvants	Tumosomes are able to provide tumor antigens and molecular adjuvants for the priming of a long-term adaptive immune response	Dendritic cells	Noh, Y.-W., Kim, S.-Y., Kim, J.-E., Kim, S., Ryu, J., Kim, I., … Lim, Y. T. (2017). Multifaceted Immunomodulatory Nanoliposomes: Reshaping Tumors into Vaccines for Enhanced Cancer Immunotherapy. Advanced Functional Materials, 27(8), 1605398.doi:10.1002/adfm.201605398	178
Melanoma	Lipid NPs encapsulating mRNA coding for OVA, FFL, Cre, gp100, and TRP2.	In addition to inducing the proliferation of CD8+ T cells, this method also demonstrated the functionality of the NK cells by increasing the overall animal survival	CD8 + cytotoxic T cells	Oberli, M. A., Reichmuth, A. M., Dorkin, J. R., Mitchell, M. J., Fenton, O. S., Jaklenec, A., … Blankschtein, D. (2016). Lipid Nanoparticle Assisted mRNA Delivery for Potent Cancer Immunotherapy. Nano Letters, 17(3), 1326–1335. doi:10.1021/acs.nanolett.6b033	179
Melanoma	RNA-LPX formed by DOTMA/DOPE liposomes and Luc-RNA	RNA-LPX are able to ativate CD8+ T cells in a IFNα dependent manner, allowing these cells to collect effector functions and execute potent in vivo anti-tumour activity	CD8 + cytotoxic T cells	Kranz, L. M., Diken, M., Haas, H., Kreiter, S., Loquai, C., Reuter, K. C., … Sahin, U. (2016). Systemic RNA delivery to dendritic cells exploits antiviral defence for cancer immunotherapy. Nature, 534(7607), 396–401. doi:10.1038/nature18300	180
Lymphoma	The polymers pheophorbide A and polyethyleneimine were complexed with OVA forming PheoA-PEI/OVA NPs that are responsive to light	The DCs encapsulating PheoA-PEI/OVA NPs showed with light irradiation drastically enhanced CTL activity and antitumor effects in vivo	CD8 + cytotoxic T cells	Zhang, C., Zhang, J., Shi, G., Song, H., Shi, S., Zhang, X., … Li, C. (2017). A Light Responsive Nanoparticle-Based Delivery System Using Pheophorbide A Graft Polyethylenimine for Dendritic Cell-Based Cancer Immunotherapy. Molecular Pharmaceutics, 14(5), 1760–1770. doi:10.1021/acs.molpharmaceut.	181
	PEG hydrogel cross-linked with two fibronectin-derived peptides and decorated with gold nanoparticles functionalized with CD3 antibody	The formulation was able to activate and help the proliferation of T cells	T cells	Guasch J, Muth CA, Diemer J, Riahinezhad H, Spatz JP. Integrin-Assisted T-Cell Activation on Nanostructured Hydrogels. Nano Lett. 2017 Oct 11;17(10):6110-6116. doi: 10.1021/acs.nanolett.7b02636. Epub 2017 Sep 6. PMID: 28876947.	196
	Single-walled carbon nanotubes were functionalized with anti-CD3	T cells had the hability to proliferate and become activated by the formulation	T cells	Fadel TR, Look M, Staffier PA, Haller GL, Pfefferle LD, Fahmy TM. Clustering of stimuli on single-walled carbon nanotube bundles enhances cellular activation. Langmuir. 2010 Apr 20;26(8):5645-54	197
Melanoma	Carbon nanotube-polymer composites functionalized with MHC-I and anti-CD28 and simultaneously administering IL-2	The formulation enabled the expansion of T cells and was able to delay tumour growth	T cells	Fadel TR, Sharp FA, Vudattu N, Ragheb R, Garyu J, Kim D, Hong E, Li N, Haller GL, Pfefferle LD, Justesen S, Herold KC, Fahmy TM. A carbon nanotube-polymer composite for T-cell therapy. Nat Nanotechnol. 2014 Aug;9(8):639-47. doi: 10.1038/nnano.2014.154. Epub 2014 Aug 3. Erratum in: Nat Nanotechnol. 2014 Sep;9(9):723	198
Melanoma	Protein NGs that selectively release their cargo (IL-15 super-agonist complex) in response to T cell receptor activation	This project shows a safe delivery systems of cytokines helping the expansion of T cells	T cells	Tang L, Zheng Y, Melo MB, Mabardi L, Castaño AP, Xie YQ, Li N, Kudchodkar SB, Wong HC, Jeng EK, Maus MV, Irvine DJ. Enhancing T cell therapy through TCR-signaling-responsive nanoparticle drug delivery. Nat Biotechnol. 2018 Sep;36(8):707-716. doi: 10.1038/nbt.4181. Epub 2018 Jul 9.	199
Ovarian cancer	CAR T-cells designed to transport liposomal nanoparticles encapsulating a molecular adenosine antagonist	By blocking adenosine's immunosuppressive effect within the TME of solid tumors it was possible to hamper T cell activity	T cells	Siriwon N, Kim YJ, Siegler E, Chen X, Rohrs JA, Liu Y, Wang P. CAR-T Cells Surface-Engineered with Drug-Encapsulated Nanoparticles Can Ameliorate Intratumoral T-cell Hypofunction. Cancer Immunol Res. 2018 Jul;6(7):812-824. doi: 10.1158/2326-6066.CIR-17-0502	200
Lymphoma / breast cancer	Magnetic nanoclusters decorated with anti-PD-1 antibodies	Through the blocking of PD-1 it was possible to delay tumor growth	T cells	Nie W, Wei W, Zuo L, Lv C, Zhang F, Lu GH, Li F, Wu G, Huang LL, Xi X, Xie HY. Magnetic Nanoclusters Armed with Responsive PD-1 Antibody Synergistically Improved Adoptive T-Cell Therapy for Solid Tumors. ACS Nano. 2019 Feb 26;13(2):1469-1478. doi: 10.1021/acsnano.8b07141.	201
Breast cancer	Macroporous scaffolds from polymerized alginate harboring bioengineered T cells coupled with silica microparticles delivering IL-15 superagonist.	These polymer matrices deliver and stimulate T cells when placed in tumor resection sites or close to inoperable tumors, reducing tumor burden	T cells	Stephan, S., Taber, A., Jileaeva, I. et al. Biopolymer implants enhance the efficacy of adoptive T-cell therapy. Nat Biotechnol 33, 97–101 (2015). https://doi.org/10.1038/nbt.3104	202
Leukemia	PGA polymeric NPs carrying CAR genes	These NPs can selectively deliver leukaemia-specific CAR genes into host T cells in situ and programed T cells in quantities that are sufficient to bring about tumour regression	T cells	Smith TT, Stephan SB, Moffett HF, McKnight LE, Ji W, Reiman D, Bonagofski E, Wohlfahrt ME, Pillai SPS, Stephan MT. In situ programming of leukaemia-specific T cells using synthetic DNA nanocarriers. Nat Nanotechnol. 2017 Aug;12(8):813-820. doi: 10.1038/nnano.2017.57.	204
Melanoma	Liposome composed of DOPC, cholesterol, DSPE-PEG, and DSPE-PEG-maleimide anchoring anti-CD137 and IL-2	By anchoring of IL-2 and anti-CD-137 in the liposome surface researchers achieved the enhancement of antigen-specific CD8+ T-cell responses resulting in anti-tumor activity.	CD8 + cytotoxic T cells	Zhang, Y., Li, N., Suh, H., & Irvine, D. J. (2018). Nanoparticle anchoring targets immune agonists to tumors enabling anti-cancer immunity without systemic toxicity. Nature Communications, 9(1).doi:10.1038/s41467-017-02251-3	212
Melanoma	Nanogels anchored with IL-2/Fc fusion protein and composed by the redox responsive cross-linker NHS-SS-NHS and by NH2-PEG-NH2.	This method enabled a prolonged and gradual release of IL-2/Fc and significantly enhanced the development of CD8+ memory precursors	CD8 + cytotoxic T cells	Xie, Y.-Q., Arik, H., Wei, L., Zheng, Y., Suh, H., Irvine, D. J., & Tang, L. (2019). Redox-responsive interleukin-2 nanogel specifically and safely promotes the proliferation and memory precursor differentiation of tumor-reactive T-cells. Biomaterials Science. doi:10.1039/c8bm01556b	213
Ovarian / Coloretal cancer	Liposomes functionalized with IL-12 shielded with poly- L-arginine with an outer layer of hyaluronic acid or poly-L- glutamic acid	The IL-12 transported by these NPs caused a shift toward higher CD8+ T cell populations in the tumor resulting in tumor growth arrest	T cells	Barberio, A. E., Smith, S. G., Correa, S., Nguyen, C., Nhan, B., Melo, M., … Hammond, P. T. (2020). Cancer Cell Coating Nanoparticles for Optimal Tumor-Specific Cytokine Delivery. ACS Nano.doi:10.1021/acsnano.0c03109	214
Melanoma	Liposomal polymeric cyclodextrin gel and cytokine-encapsulating polymers delivering TGF-β inhibitor and IL-2	TGF-β inhibitor and IL-2-released by nanogels markedly slowed down the growth of tumors, extended the life of tumor-bearing mice, and boosted intratumorally activated CD8+ T-cells and natural killer cells activity.	NK cells	Park, J., Wrzesinski, S. H., Stern, E., Look, M., Criscione, J., Ragheb, R., … Fahmy, T. M. (2012). Combination delivery of TGF-β inhibitor and IL-2 by nanoscale liposomal polymeric gels enhances tumour immunotherapy. Nature Materials, 11(10), 895–905.doi:10.1038/nmat3355	215
Pancreatic ductal adenocarcinoma	Magnetic iron NPs coated with monodisperse dimercaptosuccinic acid as a delivery system for the anti-tumorigenic cytokine IFN-y	Using an external magnetic field it is possible to direct the NPs to the tumor. Hence IFN-g accumulation in the tumor site without systemic toxicity, increasing tumor infiltration of T cells and macrophages that resulted in a significant reduction in tumor size	T cells	Mejías, R., Pérez-Yagüe, S., Gutiérrez, L., Cabrera, L. I., Spada, R., Acedo, P., … Barber, D. F. (2011). Dimercaptosuccinic acid-coated magnetite nanoparticles for magnetically guided in vivo delivery of interferon gamma for cancer immunotherapy. Biomaterials, 32(11), 2938–2952.doi:10.1016/j.biomaterials.201	216
Melanoma	Liposomes formed by egg-phosphatidylcholine and egg-phosphatidyl- glycerol encapsulating IFNg	This liposomal system that allowed the delivery of IFN-g and generated a systemic immune response against melanoma	T cells	Van Slooten, M. L., Storm, G., Zoephel, A., Küpcü, Z., Boerman, O., Crommelin, D. J. A., … Kircheis, R. (2000). Pharmaceutical Research, 17(1), 42–48. doi:10.1023/a:1007514424253	217
Colon epithelial carcinoma	Chitosan-based NPs to deliver a new jointed gene (dsNKG2D–IL-21)	Because of their improved permeability and retention properties, dsNKG2D–IL-21 gene chitosan nanoparticles encouraged more lymphocytes to infiltrate into tumor tissues in order to eradicate the tumor	T cells	Tan L, Han S, Ding S, et al. Chitosan nanoparticle-based delivery of fused NKG2D-IL-21 gene suppresses colon cancer growth in mice. Int J Nanomedicine. 2017;12:3095-3107. Published 2017 Apr 13. doi:10.2147/IJN.S128032	218

## Sheet: Supp. Table 2 - Biological NPs
Supplementary Table 2
Type of cancer	Formulation	Method of action	Taget immune cell	References	Reference number
Melanoma	NVs were prepared after the lysis engineered HEK 293T cells that express PD-1 on their membrane	These NVs enhance antitumor responses by disrupting the PD-1/PD-L1 immune inhibitory axis	T cells	Zhang X, Wang C, Wang J, Hu Q, Langworthy B, Ye Y, Sun W, Lin J, Wang T, Fine J, Cheng H, Dotti G, Huang P, Gu Z. PD-1 Blockade Cellular Vesicles for Cancer Immunotherapy. Adv Mater. 2018 May;30(22):e1707112. doi: 10.1002/adma.201707112. Epub 2018 Apr 14. PMID: 29656492.	166
Breast cancer	The EVs were isolated from the cell culture medium of a breast epithelial cell line B2M / PD-L1 knock-out and havPD-1 knock-in	havPD-1 overexpressing EVs as drug nanocarriers of PARP inhibitors that induced cancer cell apoptosis and were able to suppress their proliferation	T cells	Chen Y, Wang L, Zheng M, Zhu C, Wang G, Xia Y, Blumenthal EJ, Mao W, Wan Y. Engineered extracellular vesicles for concurrent Anti-PDL1 immunotherapy and chemotherapy. Bioact Mater. 2021 Jul 21;9:251-265. doi: 10.1016/j.bioactmat.2021.07.012. PMID: 34820569; PMCID: PMC8586263.	167
Breast cancer / Melanoma	Fc-EV technology for the production of EVs with modified surface with an Fc-binding component to allow the EVs to be decorated with antibodies	Fc-EVs displaying PD-L1-Ab were enriched especially in PD-L1+ tumor cells, and can be useful for example to carry anticancer agents	T cells	Wiklander, O.P.B., Mamand, D.R., Mohammad, D.K. et al. Antibody-displaying extracellular vesicles for targeted cancer therapy. Nat. Biomed. Eng (2024). https://doi.org/10.1038/s41551-024-01214-6	168
Colon adenocarcinoma	EVs surface was modified to display SIRPα in order to block the immunological checkpoint CD47	By blocking CD47 on cancer cells, it promotes their phagocitosys by macrophages leading to inhibition of tumor growth	Macrophages	Koh, E., Lee, E. J., Nam, G.-H., Hong, Y., Cho, E., Yang, Y., & Kim, I.-S. (2017). Exosome-SIRPα, a CD47 blockade increases cancer cell phagocytosis. Biomaterials, 121, 121–129.doi:10.1016/j.biomaterials.201	169
Metastatic breast cancer	The surface of the exosomes was functionally engineered with CD62L and OX40L Treg by forced expression of the genes in the donor cells	The EVs showed the capacity to target the lymph nodes, and resulted in activated effector T cells and inhibited Treg induction, thereby amplifying the antitumor immune response and inhibiting tumor development	T cells	Ji P, Yang Z, Li H, Wei M, Yang G, Xing H, Li Q. Smart exosomes with lymph node homing and immune-amplifying capacities for enhanced immunotherapy of metastatic breast cancer. Mol Ther Nucleic Acids. 2021 Oct 19;26:987-996. doi: 10.1016/j.omtn.2021.10.009. PMID: 34760340; PMCID: PMC8560825.	187
Colon carcinoma	The ASPIRE nanovaccine is derived from recombinant adenovirus-infected dendritic cells in which pMHC-I and anti-PD1 antibody are simultaneously anchored	This strategy can markedly improve antigen delivery to lymphoid organs and generate broad-spectrum T-cell responses that eliminate established tumours	T cells	Liu, C., Liu, X., Xiang, X. et al. A nanovaccine for antigen self-presentation and immunosuppression reversal as a personalized cancer immunotherapy strategy. Nat. Nanotechnol. 17, 531–540 (2022). https://doi.org/10.1038/s41565-022-01098-0	188
Schwannoma	HEK-293T cells transfected with the CD-UPRT-mRNA procuded MVs with the CD-UPRT protein	The simultaneous administration of CD-UPRT-mRNA/protein-bearing MVs and treated with 5-FC resulting in significant inhibition of schwannoma tumor growth		Mizrak A, Bolukbasi MF, Ozdener GB, Brenner GJ, Madlener S, Erkan EP, Ströbel T, Breakefield XO, Saydam O. Genetically engineered microvesicles carrying suicide mRNA/protein inhibit schwannoma tumor growth. Mol Ther. 2013 Jan;21(1):101-8. doi: 10.1038/mt.2012.161.	189
Breast cancer	EVs derived from modified donor cells expressed the GE11 peptide or EGF on their surfaces and delivered let-7a miRNA to EGFR-expressing cancer tissues	By targeting EGFR-expressing cancer tissues and delivering the anticancer miRNA it was possible to inhibit tumor development		Ohno S, Takanashi M, Sudo K, Ueda S, Ishikawa A, Matsuyama N, Fujita K, Mizutani T, Ohgi T, Ochiya T, Gotoh N, Kuroda M. Systemically injected exosomes targeted to EGFR deliver antitumor microRNA to breast cancer cells. Mol Ther. 2013 Jan;21(1):185-91. doi: 10.1038/mt.2012.180. Epub 2012 Oct 2.	190
Lymphoma	Generated HEK293T-derived EVs to present the CD19 antigen as the CAR target	These EVs were used to stimulate and help in the proliferation of CAR-T cells. CAR-T cells expand faster after EV treatment and show great antitumor effect	CAR-T cells	Zhang Y, Ge T, Huang M, Qin Y, Liu T, Mu W, Wang G, Jiang L, Li T, Zhao L, Wang J. Extracellular Vesicles Expressing CD19 Antigen Improve Expansion and Efficacy of CD19-Targeted CAR-T Cells. Int J Nanomedicine. 2023 Jan 5;18:49-63. doi: 10.2147/IJN.S390720.	208
Colon carcinoma	EVs were derived by genetically modified cancer cells (overexpressing IL-12 and/or shRNA targeting mRNA for TGF-β1 (MC38/IL12shTGFβ1, MC38/shTGFβ1)	Tumor growth inhibition was made possible by the EVs, which also increased systemic and local Th1-type anticancer activity and decreased the amount of MDSCs in the tumor	T cells	Rossowska J, Anger N, Wegierek K, Szczygieł A, Mierzejewska J, Milczarek M, Szermer-Olearnik B, Pajtasz-Piasecka E. Antitumor Potential of Extracellular Vesicles Released by Genetically Modified Murine Colon Carcinoma Cells With Overexpression of Interleukin-12 and shRNA for TGF-β1. Front Immunol. 2019 Feb 13;10:211. doi: 10.3389/fimmu.2019.00211. PMID: 30814999; PMCID: PMC6381037.	221
Bladder cancer	Tumor derived EVs decorated with GPI-anchored IL-2	It was shown that T lymphocyte proliferation was stimulated the effectiveness of antigen-specific responses in cytotoxic T cell was improved	T cells	Zhang J, Zhang Y, Luo C, Xia Y, Chen H, Wu X. Glycosyl-phosphatidylinositol-anchored interleukin-2 expressed on tumor-derived exosomes induces antitumor immune response in vitro. Tumori. 2010 May-Jun;96(3):452-9. doi: 10.1177/030089161009600313.	222
Thyroid cancer	Mesenchymal stem cells derived EVs decorated with IL4RPep-1 peptide	This study shows that EVs can target IL-4R-expressing thyroid cancers by using the IL4RPep-1 peptide as their targeting moiety		Gangadaran P, Gunassekaran GR, Rajendran RL, Oh JM, Vadevoo SMP, Lee HW, Hong CM, Lee B, Lee J, Ahn BC. Interleukin-4 Receptor Targeting Peptide Decorated Extracellular Vesicles as a Platform for In Vivo Drug Delivery to Thyroid Cancer. Biomedicines. 2022 Aug 15;10(8):1978. doi: 10.3390/biomedicines10081978.	223
Leukemia	Genetically modified HEK293T cells express Lamp2b coupled to an IL-3 fragment loaded with siRNA or imatinib	The EVs can specifically target leukemia cells and stoped the proliferation of cancer cells both in vitro and in vivo		Bellavia D, Raimondo S, Calabrese G, Forte S, Cristaldi M, Patinella A, Memeo L, Manno M, Raccosta S, Diana P, Cirrincione G, Giavaresi G, Monteleone F, Fontana S, De Leo G, Alessandro R. Interleukin 3- receptor targeted exosomes inhibit in vitro and in vivo Chronic Myelogenous Leukemia cell growth. Theranostics. 2017 Mar 16;7(5):1333-1345. doi: 10.7150/thno.17092. PMID: 28435469; PMCID: PMC53995…	108
Lymphoma	IL-12-anchored EVs were generated from engineered 293T cells expressing IL-12 on the cell membrane via GPI structure. Additionally, EVs co-expressing IL-12 and CD19 were also produced	The EVs enhanced targeting of CAR-T cells and established an efficient delivery platform for the targeted transport of bioactive chemicals, such IL-12, to CAR-T cells.	CAR-T cells	Meijuan Huang, Lei Zhao, Dengju Li, Liang Huang, Jue Wang, Yuanyuan Zhang; Targeted Delivery of IL-12 Via CD19-Modified Extracellular Vesicles Enhances CAR-T Cell Efficacy Against Lymphoma. Blood 2023; 142 (Supplement 1): 6798. doi: https://doi.org/10.1182/blood-2023-180860	224
